# Supplementary material for: Thermoelectric properties of the tetrahedrite–tennantite solid solutions Cu12Sb4−xAsxS13 and Cu10Co2Sb4−yAsyS13 (0 ≤ x, y ≤ 4)
Source: Royal Society of Chemistry journal article supplement (doi:10.1039/c9cp00213h), 2019-01-01
Supplement: c9cp00213h1.pdf [file c9cp00213h1.pdf]

## Electronic Supplementary Information

### Thermoelectric properties of the tetrahedrite-tennantite solid solutions $\text{Cu}_{12}\text{Sb}_{4-x}\text{As}_x\text{S}_{13}$ and $\text{Cu}_{10}\text{Co}_2\text{Sb}_{4-y}\text{As}_y\text{S}_{13}$ ( $0 \leq x, y \leq 4$ )

Petr Levinsky<sup>1,2,3</sup>, Christophe Candolfi<sup>1</sup>, Anne Dauscher<sup>1</sup>, Janusz Tobola<sup>4</sup>, Jiří Hejtmánek<sup>2</sup>,  
Bertrand Lenoir<sup>1,\*</sup>

<sup>1</sup>*Institut Jean Lamour, UMR 7198 CNRS – Université de Lorraine, Campus ARTEM, 2 allée  
André Guinier, BP 50840, 54011 Nancy, France*

<sup>2</sup>*Institute of Physics of the Czech Academy of Sciences, Prague, Czech Republic*

<sup>3</sup>*Faculty of Nuclear Sciences and Physical Engineering, Czech Technical University, Prague,  
Czech Republic*

<sup>4</sup>*Faculty of Physics and Applied Computer Science, AGH University of Science and  
Technology, 30-059 Krakow, Poland*

\*Contact author: [bertrand.lenoir@univ-lorraine.fr](mailto:bertrand.lenoir@univ-lorraine.fr)

### Content

**Figure S1.** Temperature dependence of the Lorenz number  $L$  for the  $\text{Cu}_{12}\text{Sb}_{4-x}\text{As}_x\text{S}_{13}$  and  $\text{Cu}_{10}\text{Co}_2\text{Sb}_{4-y}\text{As}_y\text{S}_{13}$  solid solutions.

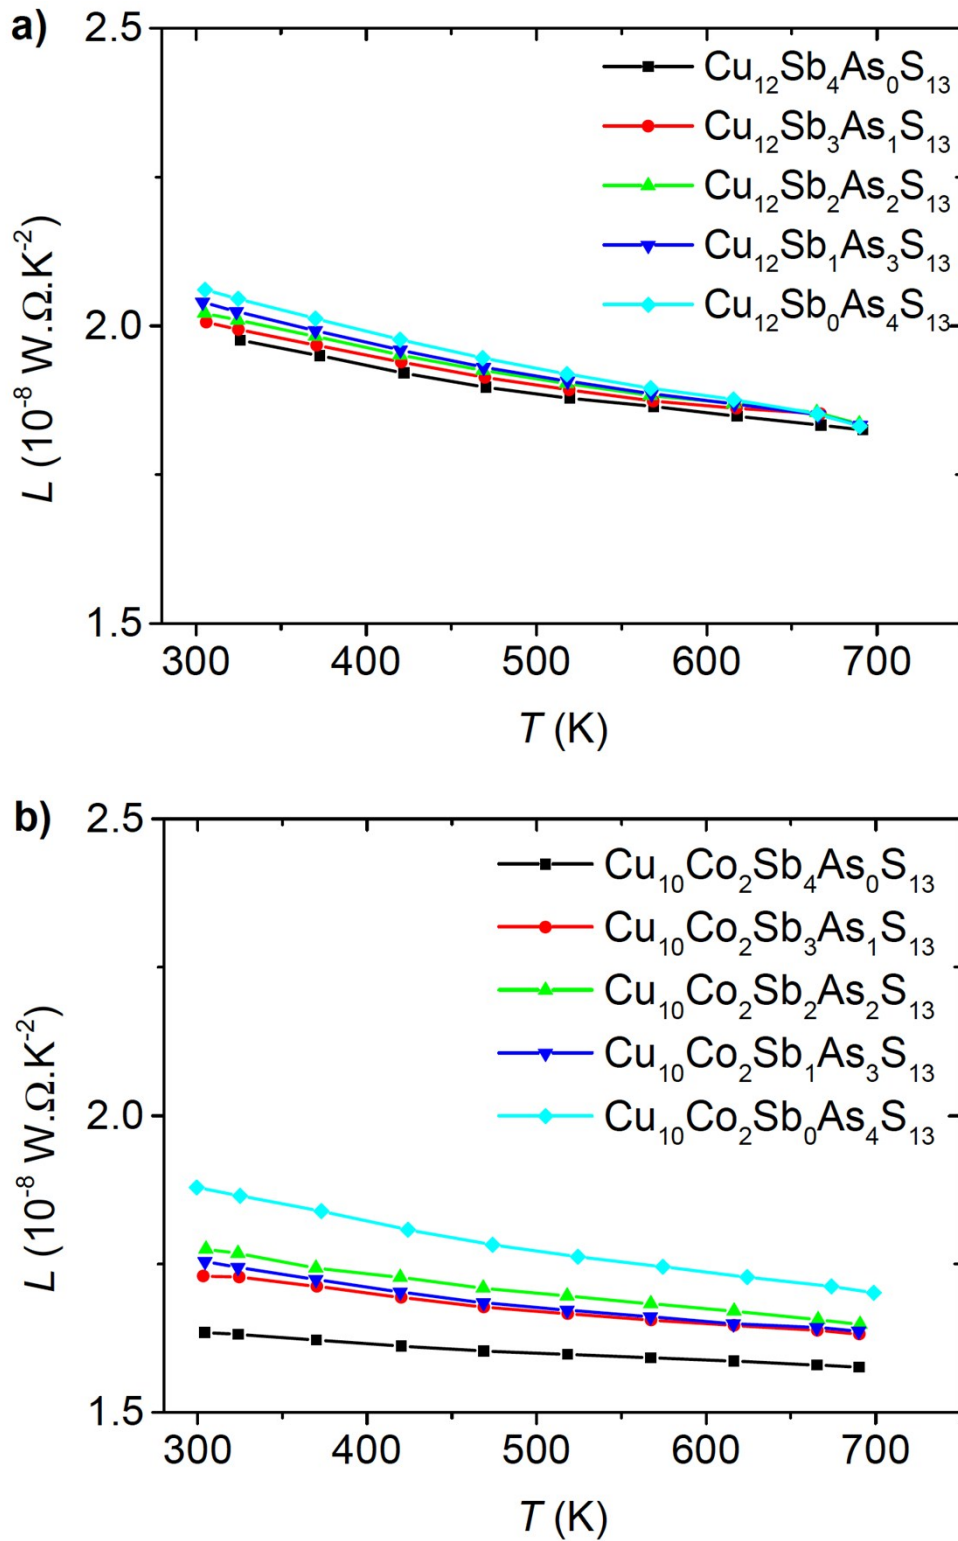

**Figure S1.** Temperature dependence of the Lorenz number for the series a)  $\text{Cu}_{12}\text{Sb}_{4-x}\text{As}_x\text{S}_{13}$  and b)  $\text{Cu}_{10}\text{Co}_2\text{Sb}_{4-x}\text{As}_x\text{S}_{13}$  calculated by a single-parabolic band model with acoustic phonon scattering.
